# Supplementary material for: Promoting gene transfection by ROS responsive silicon nanowire arrays
Source: Royal Society of Chemistry journal article supplement (doi:10.1039/d2tb00415a), 2022-01-01
Supplement: d2tb00415a1.pdf [file d2tb00415a1.pdf]

## Supporting Information

### **Promoting gene transfection by ROS responsive silicon nanowire arrays**

Benben Lu, Hengxiao Wang, Xiang Shen, Kunyan Lu, Hongwei Wang\* and Lin Yuan\*

Key Lab of Health Chemistry and Molecular Diagnosis of Suzhou, Department of Polymer Science and Engineering, College of Chemistry, Chemical Engineering and Materials Science, Soochow University, Suzhou 215123, PR China

\*Corresponding authors.

E-mail address: wanghw@suda.edu.cn (H. Wang), yuanl@suda.edu.cn (L. Yuan).

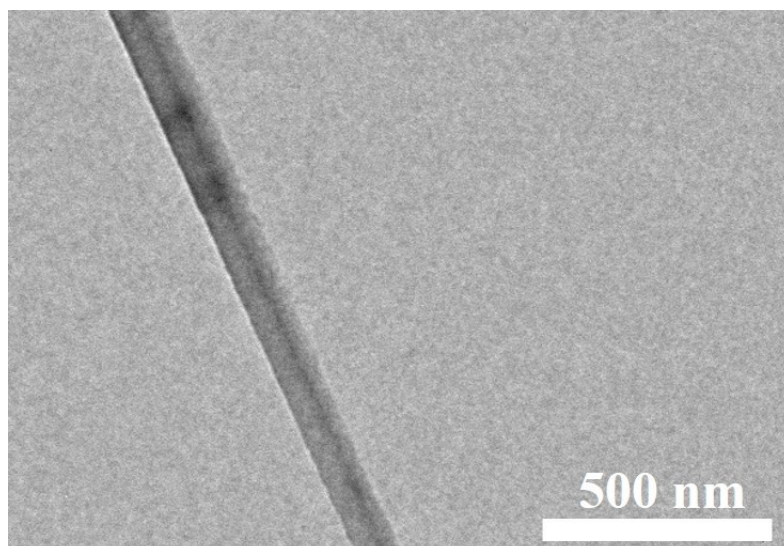

**Fig. S1** TEM image of single silicon nanowire.

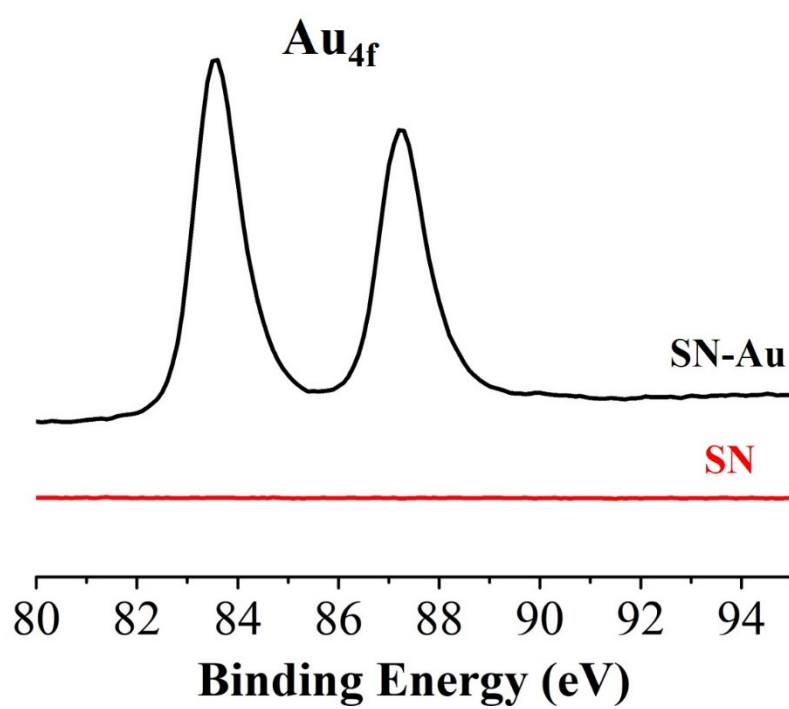

**Fig. S2** High-resolution XPS spectra of the Au elements appearing on the surface of SN-Au.

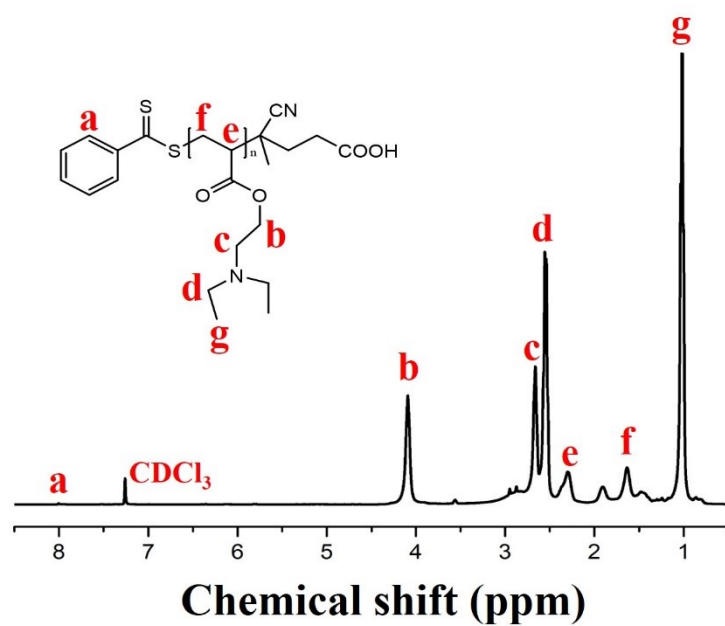

Fig. S3  $^1\text{H}$ -NMR spectrum of PDEAEA.

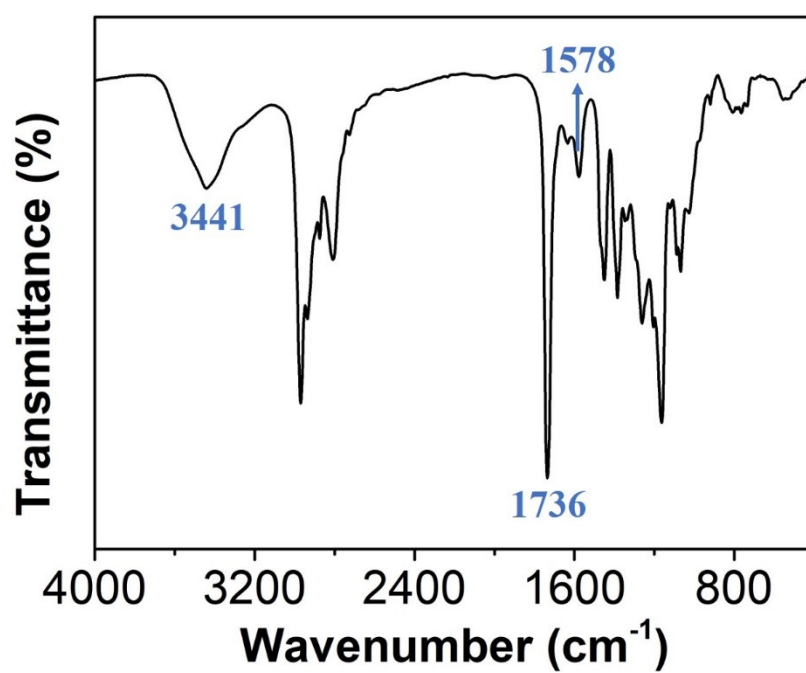

Fig. S4 FT-IR spectrum of PDEAEA.

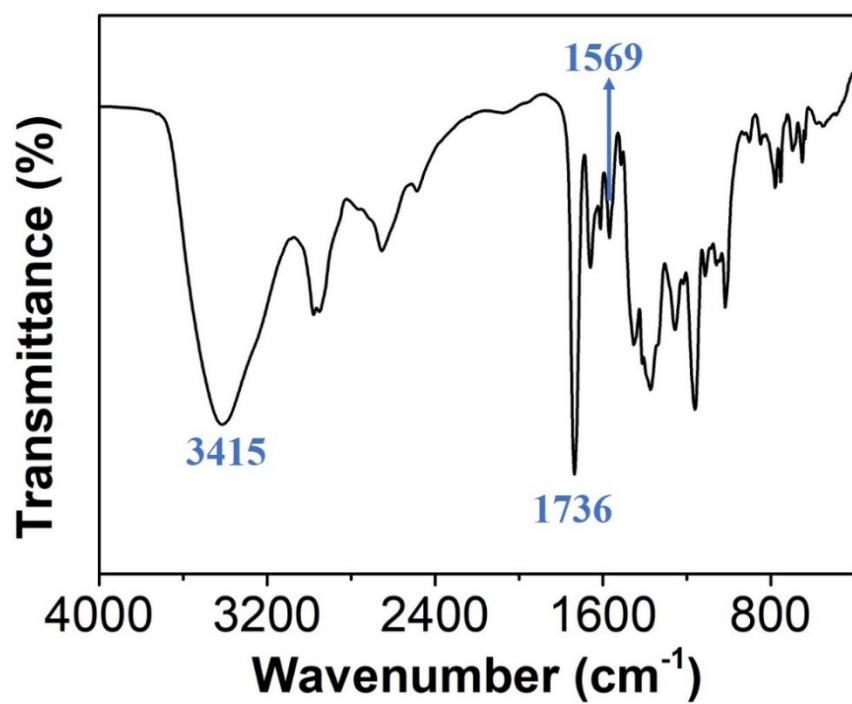

**Fig. S5** FT-IR spectrum of B-PDEAEA.

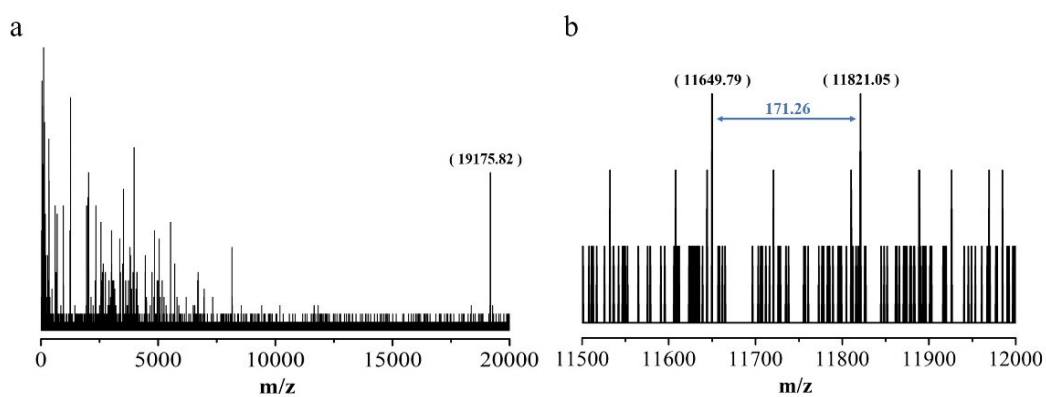

**Fig. S6** (a) Mass spectra of PDEAEA and (b) partial mass spectra.

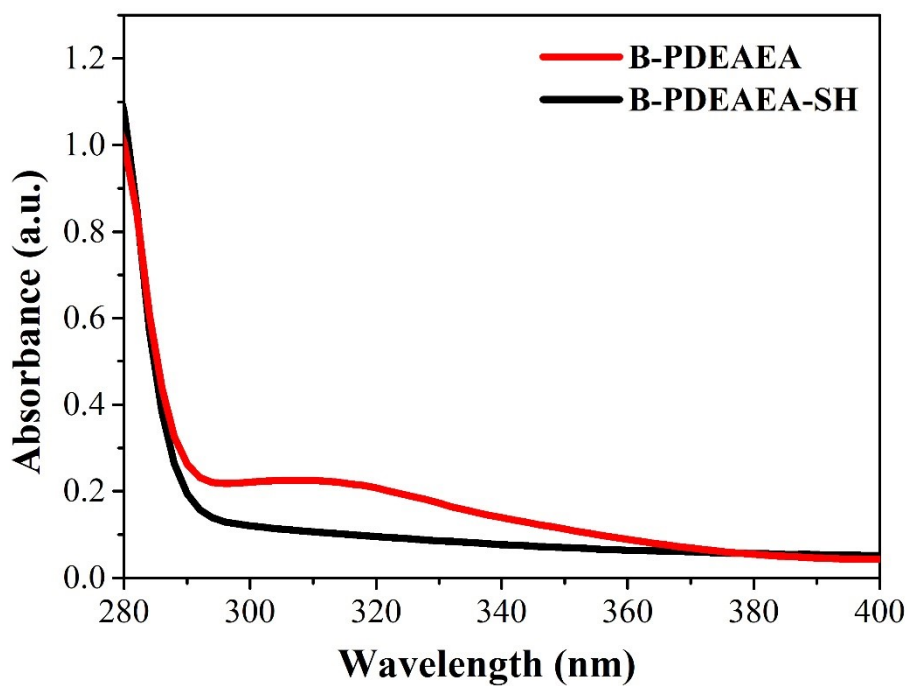

**Fig. S7** UV-Vis absorbance of B-PDEAEA/ B-PDEAEA-SH.

**Table S1.** Elemental composition from XPS of SN surfaces at different stages of modification.

|         | Elemental composition (%) |       |      |       |      |
|---------|---------------------------|-------|------|-------|------|
|         | Si                        | Au    | C    | N     | O    |
| SN      | 39.5                      | N. D. | 19.7 | 0.8   | 40.0 |
| H-SN    | 64.2                      | N. D. | 24.4 | N. D. | 11.4 |
| SN-Au-P | 16.4                      | 2.6   | 46.6 | 6.3   | 28.1 |

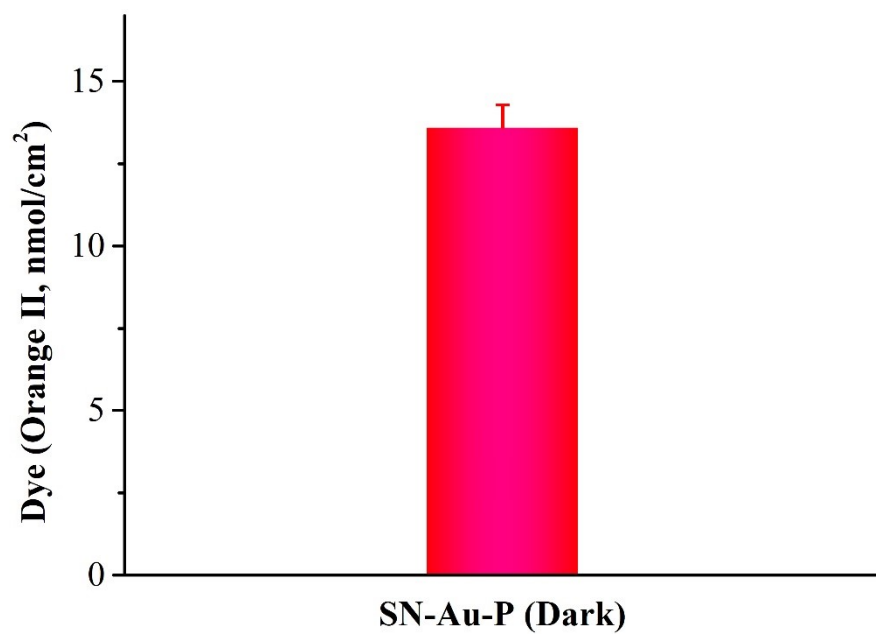

**Fig. S8** The amount of Orange II dye bound to SN-Au-P surface.

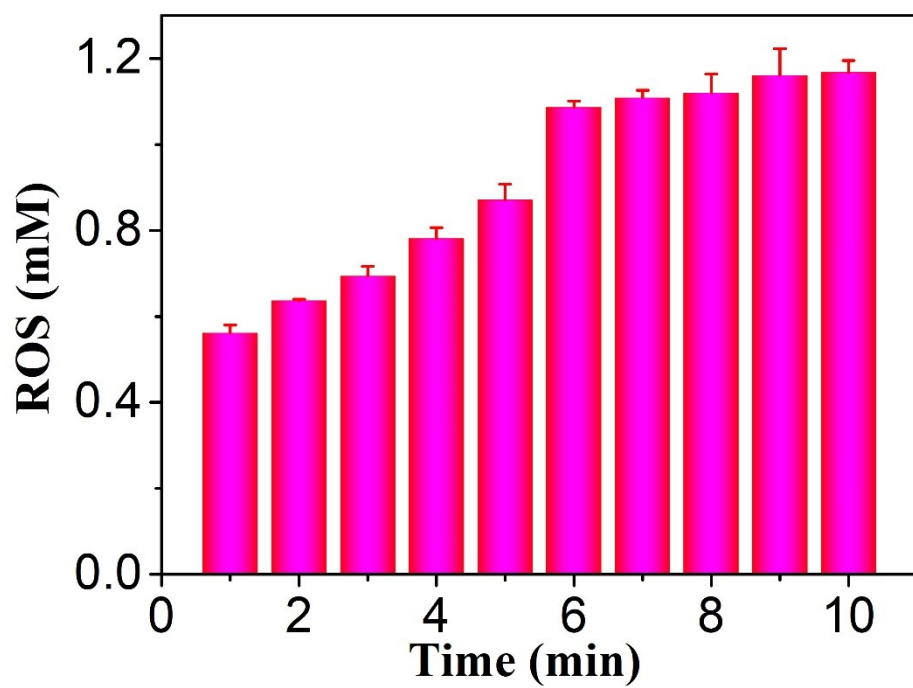

**Fig. S9** The photocatalytic properties of SN-Au.

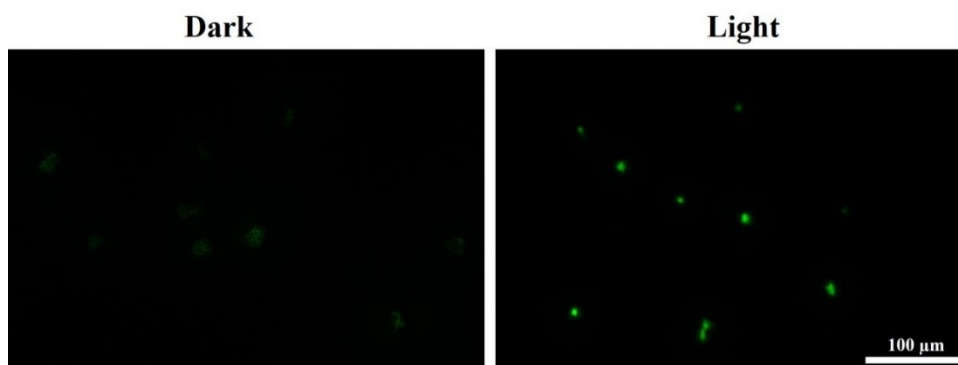

Fig. S10 DCF of Hela cells on SN-Au-P under dark or light treatment.

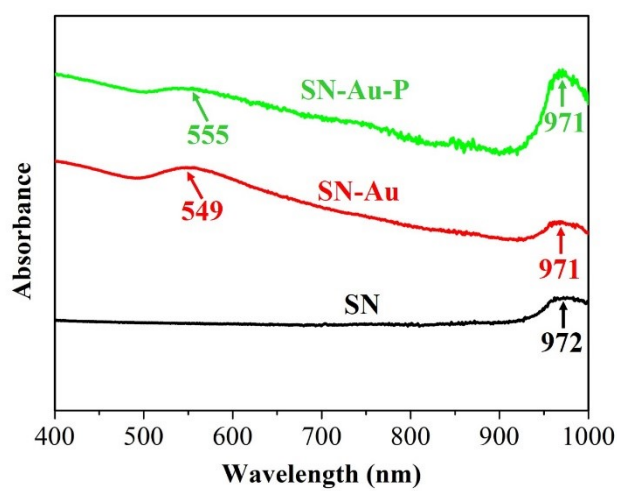

Fig. S11 Absorption spectra of SN, SN-Au and SN-Au-P.

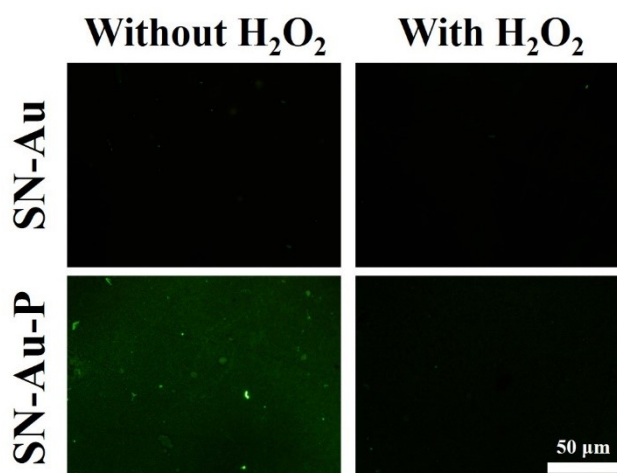

Fig. S12 Fluorescence images of different surfaces with adsorbed FITC-OVA before and after H<sub>2</sub>O<sub>2</sub> treatment.

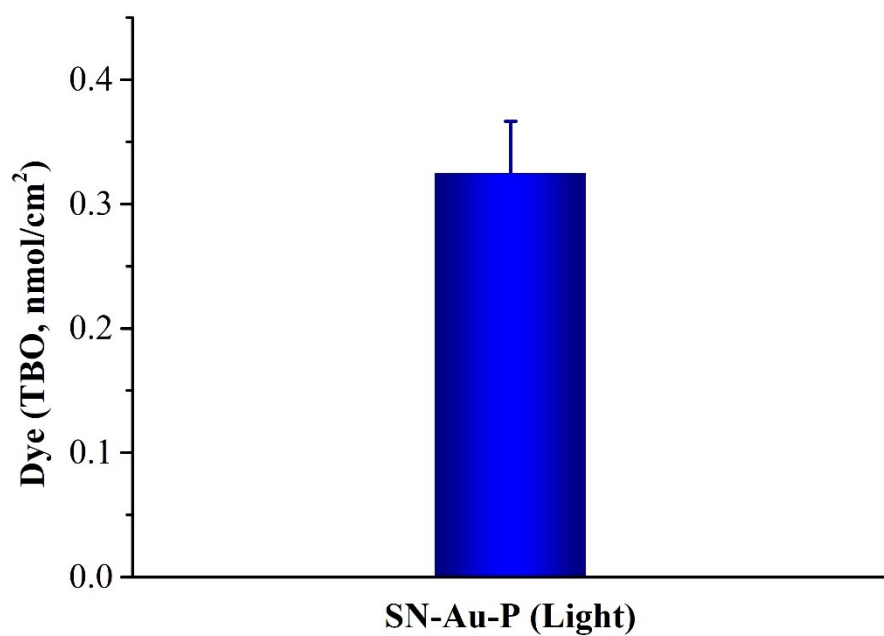

**Fig. S13** The amount of TBO dye bound to SN-Au-P surface after light treatment.

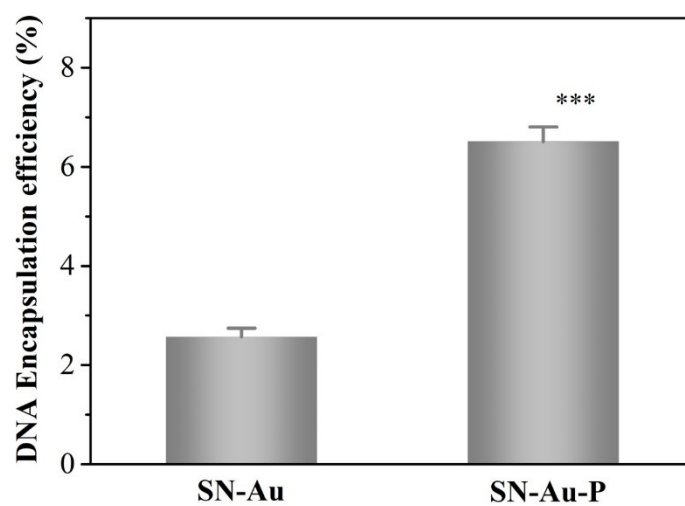

**Fig. S14** DNA loading efficiency of SN-Au and SN-Au-P. Data shown as mean  $\pm$  SD,  $n = 3$  (\*\*\*)  $p < 0.001$ , SN-Au was the control group for analysis of significant differences).

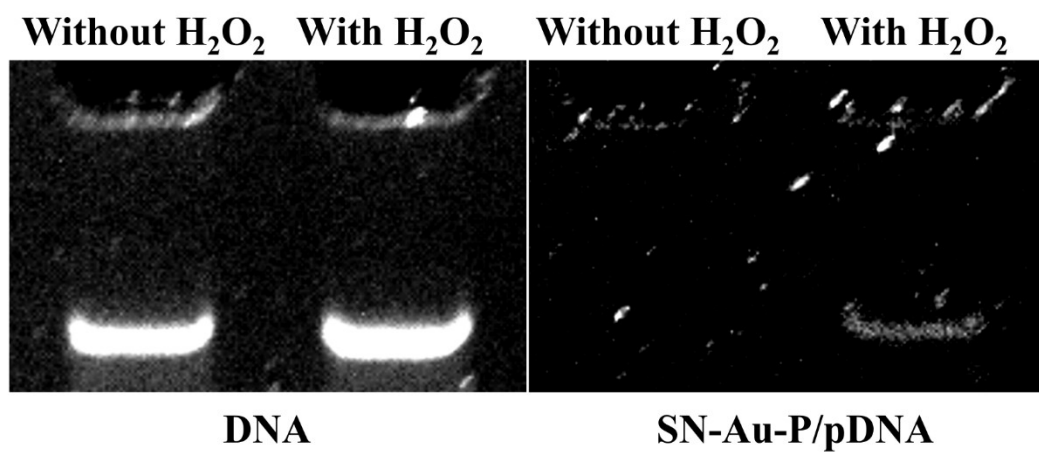

Fig. S15 Agarose gel electrophoresis assay of DNA released from the surface of SN-Au-P before and after  $H_2O_2$  treatment.

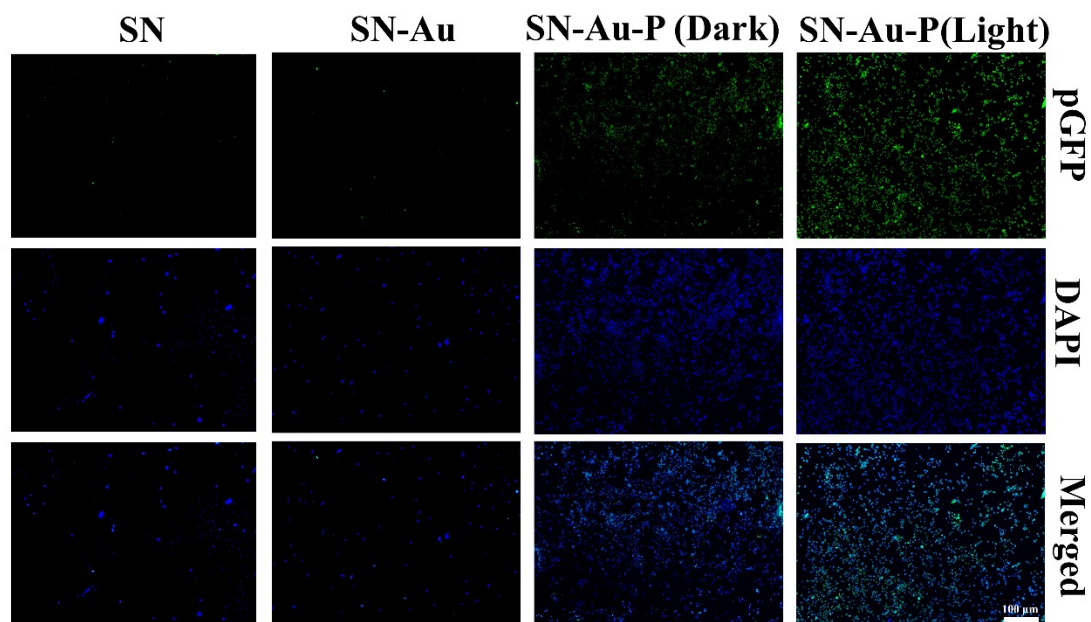

Fig. S16 Low-magnification fluorescence images of HeLa cells.

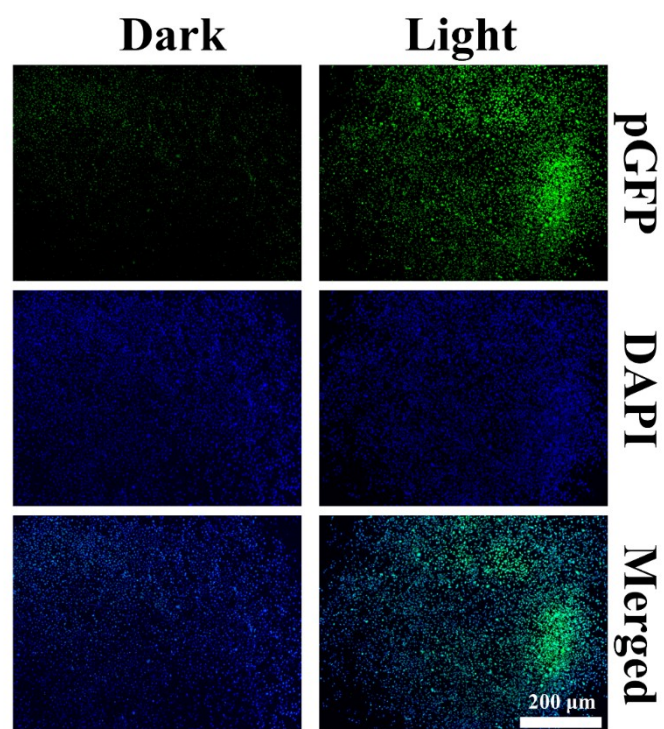

**Fig. S17** Low-magnification fluorescence images of L929 cells.

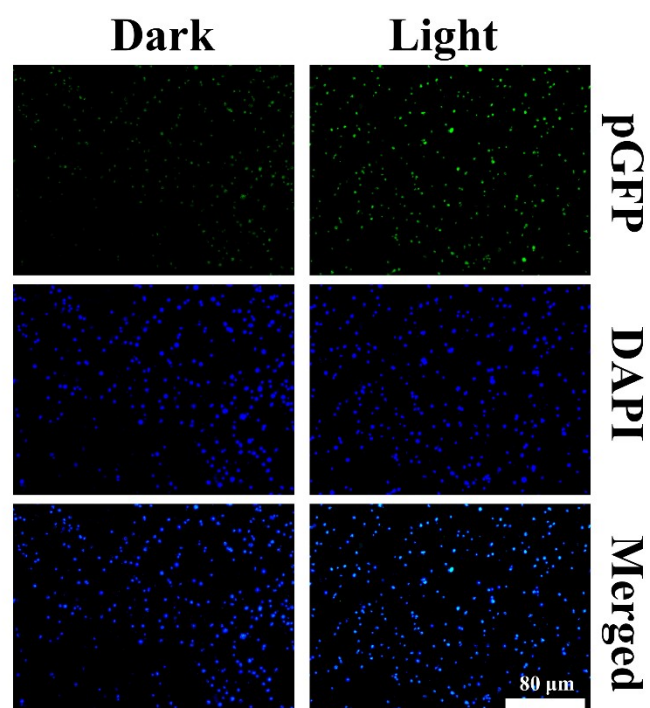

**Fig. S18** Low-magnification fluorescence images of BMSC cells.

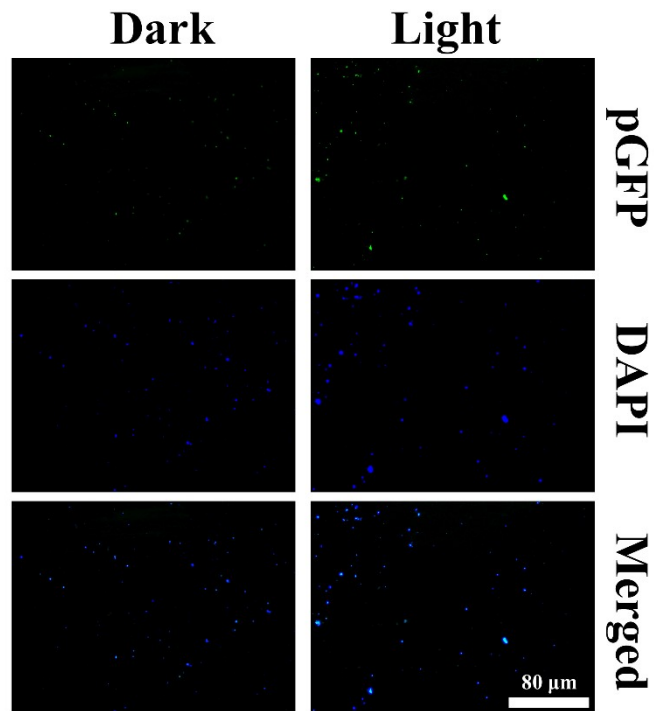

**Fig. S19** Low-magnification fluorescence images of mESC cells.

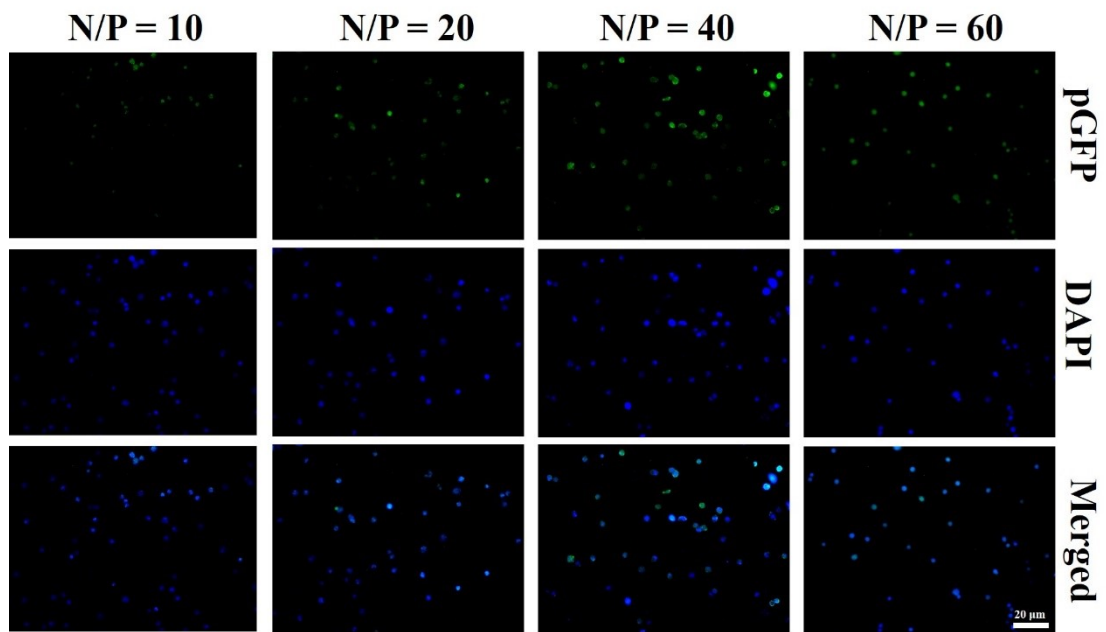

**Fig. S20** Fluorescence images of HeLa cells under various N/P ratios.

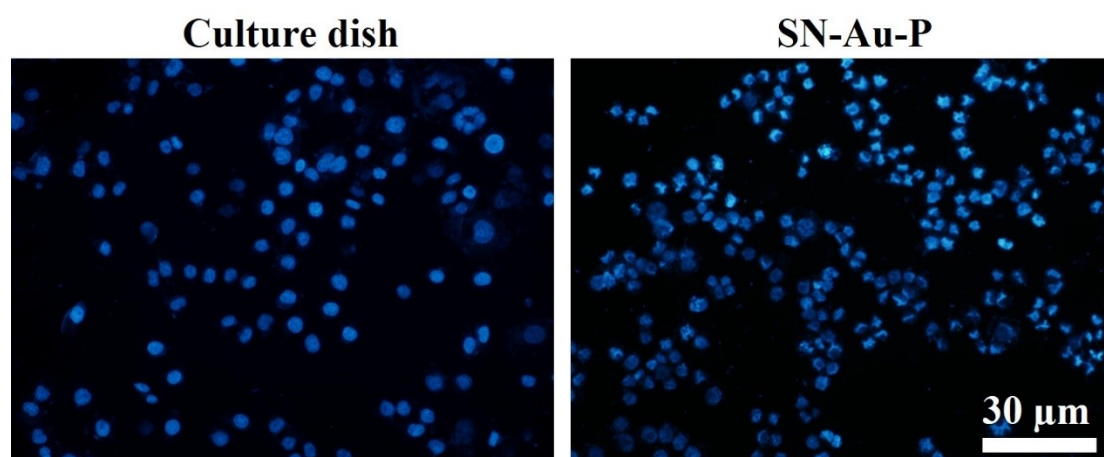

**Fig. S21** Cell nucleus on the culture dish and SN-Au-P (the nucleus was stained by DAPI dye).

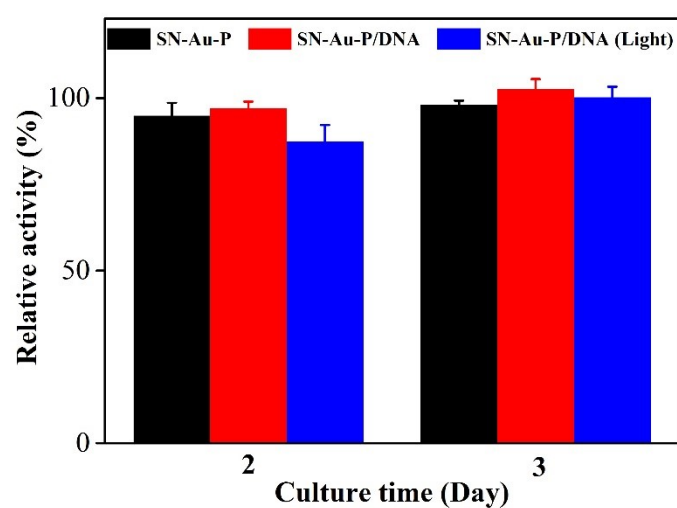

**Fig. S22** CCK-8 assay of HeLa cells on different surfaces. The same density of HeLa cells on the surface of SN-Au was used as control. Data shown as mean  $\pm$  SD,  $n = 3$ .

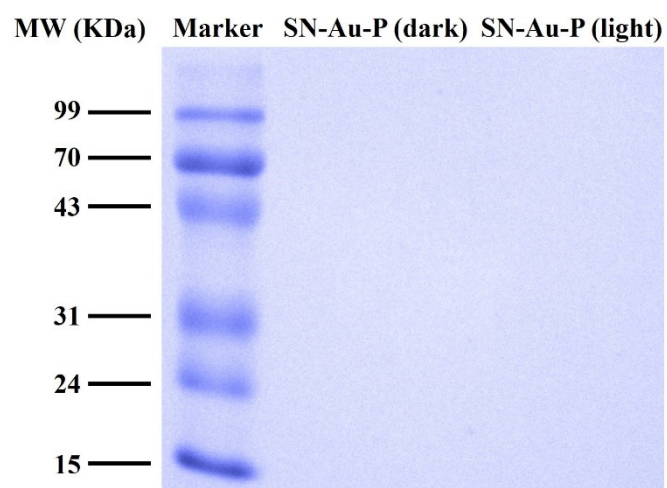

Fig. S23 SDS-PAGE of proteins in the suspension of HeLa cells on SN-Au-P under dark or light treatment.

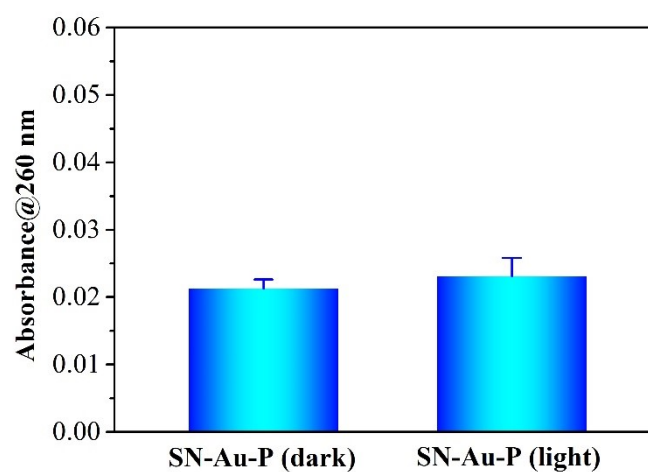

Fig. S24 The ultraviolet absorbance (260 nm) in the suspension of HeLa cells on SN-Au-P under dark or light treatment. Data shown as mean  $\pm$  SD, n = 3.
